# Supplementary material
Source: publisher figshare collection journal article supplement (https://springernature.figshare.com/ndownloader/files/22406394)
Supplement: Supplementary file 1 [file 22406394]

## Sheet: Inflamación
Variables	mean_importance	sd_importance
Week 39 CD4 T cell count	2648.23	1342.49
Week 24 CD4 T cell count	2189.71	636.508
Week 52 %CD8	1926.32	661.853
Week 39 CD4/CD8	1788.17	483.992
Week 24 %CD8	1741.65	622.599
Week 52 CD4/CD8	1721.56	1189.33
Week 24 CD4/CD8	1517.66	1106.16
Basal VL	1421.65	394.645
Week 52 CD8 T cell count	1283.74	431.568
Week 52 %CD4	1216.43	363.748
Week 39 %CD8	1190.13	790.409
Basal CD8 T cell count	944.138	423.352
Week 24 %CD4	817.783	1003.89
Basal CD4/CD8	681.55	363.417
Basal %CD4	378.656	299.565
Week 8 CD4 T cell count	372.042	378.084
Week 24 ALP	345.261	935.414
Basal %CD8	342.858	345.166
Week 39 %CD4	338.314	375.221
Basal HCT	331.834	351.842
Week 39 CD8 T cell count	307.294	759.384
Week 12 %CD8	251.553	535.826
Week 8 %CD8	236.715	738.445
Week 24 TGL	149.953	1216.52
Week 24 CD8 T cell count	138.295	1254.7
IRIS	81.0588	657.106
Week 39 VL	0	0
Week 52 VL	0	0
Week 12 %CD4	-8.81783	586.351
Week 8 CD4/CD8	-157.225	406.913
Week 12 CD4 T cell count	-165.247	335.322
Week 24 LDH	-221.638	981.265
Week 12 CD8 T cell count	-222.664	601.95
Basal uric acid	-243.426	593.27
Week 8 CD8 T cell count	-258.433	1068
Basal FB glu	-270.841	808.462
Age	-317.73	1171.19
Week 24 uric acid	-323.488	343.993
Week 24 AST	-336.182	1039.17
Week 8 %CD8 T cell count	-349.417	490.773
Basal creatinin	-400.274	224.772
Week 12 CD4/CD8 ratio	-427.413	485.256
Week 0-24 events	-432.927	752.161
Week 24 glucose	-439.583	608.114
Week 24 ALT	-454.854	812.479
Basal leucocyte count	-468.514	612.247
Week 24 serum creatinine	-525.501	706.203
Week 24 direct bilirubin	-571.967	786.294
Week 24 urea	-669.101	536.35
Week 24 cholesterol	-755.306	888.567
Basal platelets	-877.919	873.36
Week 8 viral load	NA	NA
Week 12 viral load	NA	NA
